# Supplementary material for: Restocking-Based Rollout Policies for the Vehicle Routing Problem with Stochastic Demand and Duration Limits
Source: Atypon-hosted journal article supplement (doi:10.1287/trsc.2015.0591), 2015-08-18
Supplement: trsc.2015.0591-sm-appendix.pdf [file trsc.2015.0591-sm-appendix.pdf]

## Appendix A: Proofs

### A.1. Proof of Proposition 1

We first prove property (i). Since  $Z_{c'}(\tilde{s}_{c'}) < x_{v_{c'}^m}$ , we have one of two cases. In the first case,  $Z_{c'}(\tilde{s}_{c'}) = 0$ , implying by equation (5) that  $A_{v_{c'}^m} + t(v_{c'}^m, 0) > L$ . By the triangle inequality, this implies that for any  $A_{v_{c'+1}^m}$  that may result from equations (3) or (4),  $A_{v_{c'+1}^m} + t(v_{c'+1}^m, 0) > L$ . Thus,  $Z_{c'+1}(\tilde{s}_{c'+1}) = 0$ . The same argument applies for  $c = c' + 2, \dots, C^m$ . In the second case,  $0 < Z_{c'}(\tilde{s}_{c'}) < x_{v_{c'}^m}$ , implying by equation (5) that  $\lfloor (L - t(v_{c'}^m, 0) - A_{v_{c'}^m}) / (t(v_{c'}^m, 0) + t(0, v_{c'}^m)) \rfloor < \lfloor (x_{v_{c'}^m} - Q_{v_{c'}^m}) / Q \rfloor$ , meaning the number of replenishments required to satisfy demand in full is greater than the number of replenishments possible before violating the route duration limit  $L$ . Let  $t'$  be the time at which demand at customer  $v_{c'}^m$  is served in full. It must be that  $t' + t(v_{c'}^m, 0) > L$ . Then, by the triangle inequality,  $t' + t(v_{c'}^m, v_{c'+1}^m) + t(v_{c'+1}^m, 0) > L$  and  $t' + t(v_{c'}^m, 0) + t(0, v_{c'+1}^m) + t(v_{c'+1}^m, 0) > L$ , meaning that  $A_{v_{c'+1}^m} + t(v_{c'+1}^m, 0) > L$  regardless of the action selected at decision epoch  $c'$ . Thus,  $Z_{c'+1}(\tilde{s}_{c'+1}) = 0$ . Then, using the arguments presented for the first case,  $Z_c(\tilde{s}_c) = 0$  for  $c = c' + 2, \dots, C^m$ .

We prove property (ii) by contradiction. Suppose there exists some  $c \in \{1, 2, \dots, c' - 1\}$  such that  $Z_c(\tilde{s}_c) < x_{v_c^m}$ . Then, by property (i),  $Z_j(\tilde{s}_j) = 0$  for  $j = c + 1, c + 2, \dots, C^m$ . Yet, by assumption,  $Z_j(\tilde{s}_j) = x_{v_j^m}$  for  $j = 1, 2, \dots, c' - 1$ .

### A.2. Proof of Proposition 2

The proof is by induction. First, note that if  $\tilde{V}_{C^m}(\tilde{s}_{C^m}; v^m, x) < x_{v_{C^m}^m}$ , then  $\tilde{V}_c(\tilde{s}_{C^m}; v^m, x)$  increases as  $Q_{v_{C^m}^m}$  increases and as  $A_{v_{C^m}^m}$  decreases. If  $\tilde{V}_{C^m}(\tilde{s}_{C^m}; v^m, x) = x_{v_{C^m}^m}$ , then  $\tilde{V}_{C^m}(\tilde{s}_{C^m})$  is constant as it is bounded above by  $x_{v_{C^m}^m}$ . Thus, the result holds for stage  $C^m$ . Assume the result holds for stages  $C^m - 1, C^m - 2, \dots, c + 1$ . At stage  $c$ , it follows from equation (??) that  $Z_c(\tilde{s}_c)$  increases as  $Q_{v_c^m}$  increases and as  $A_{v_c^m}$  decreases. As in stage  $C^m$ ,  $Z_c(\tilde{s}_c)$  is constant if  $Z_c(\tilde{s}_c) = x_{v_c^m}$ . By the induction hypothesis, the reward-to-go,  $\tilde{V}_{c+1}(\tilde{s}_{c+1}; v^m, x)$ , also increases as  $Q_{v_c^m}$  increases and as  $A_{v_c^m}$  decreases. Because the value function at stage  $c$  is the sum of two functions that increase as  $Q_{v_c^m}$  increases and as  $A_{v_c^m}$  decreases, the result holds at stage  $c$ .

## Appendix B: Disaggregated Results of Computational Results

In this appendix, we report the disaggregated results of our computational experiments. Table 10 details problem instance parameters. Table 11 displays the expected demand served by the benchmark restocking fixed-route policies. Table 12 shows the expected demand for each problem instance; expected demand does not change with variability in customer demand. Tables 13, 14, and 15 depict disaggregated results for our rollout policies without decomposition. Tables 16, 17, and 18 present disaggregated results for our rollout policies with static decomposition. Tables 19, 20, and 21 display disaggregated results for our rollout policies with dynamic decomposition. Table 22 is similar to Table ??, except Table 22 displays the average number of CPU seconds required to execute each method for an entire instance; Table ?? only presents the average number of CPU seconds per decision epoch. Tables 23-37 display disaggregate results for our second set of computational experiments with various heuristic mechanisms and initial policies. In Table 11, Tables 13-21, and Tables 23-37, each entry is the average demand served by the respective method across 500 realizations of the problem instance. The values in Table 12 are exact calculations.



**Table 13 Average Demand Served by One-Step Rollout without Decomposition.**

| Duration Capacity           | short  |        |        | medium |        |        | long   |        |        |
|-----------------------------|--------|--------|--------|--------|--------|--------|--------|--------|--------|
|                             | small  | medium | large  | small  | medium | large  | small  | medium | large  |
| <b>Low Variability</b>      |        |        |        |        |        |        |        |        |        |
| R101 (25)                   | 156.26 | 221.97 | 278.66 | 238.59 | 324.85 | 332.00 | 313.31 | 331.97 | 331.68 |
| C101 (25)                   | 223.95 | 299.10 | 320.06 | 317.41 | 455.14 | 459.41 | 391.97 | 459.38 | 459.63 |
| <b>Moderate Variability</b> |        |        |        |        |        |        |        |        |        |
| R101 (25)                   | 150.00 | 217.63 | 273.27 | 228.73 | 315.50 | 331.00 | 297.36 | 331.36 | 331.51 |
| C101 (25)                   | 217.11 | 293.65 | 319.50 | 308.03 | 434.09 | 458.03 | 383.97 | 456.92 | 458.96 |
| <b>High Variability</b>     |        |        |        |        |        |        |        |        |        |
| R101 (25)                   | 144.78 | 209.63 | 262.09 | 216.37 | 298.84 | 329.59 | 282.83 | 331.35 | 331.56 |
| C101 (25)                   | 206.19 | 281.06 | 312.30 | 299.57 | 406.90 | 454.30 | 374.02 | 453.56 | 459.47 |

**Table 14 Average Demand Served by Post-Decision Rollout without Decomposition.**

| Duration Capacity           | short  |        |        | medium |        |        | long   |        |        |
|-----------------------------|--------|--------|--------|--------|--------|--------|--------|--------|--------|
|                             | small  | medium | large  | small  | medium | large  | small  | medium | large  |
| <b>Low Variability</b>      |        |        |        |        |        |        |        |        |        |
| R101 (25)                   | 156.15 | 221.98 | 278.66 | 238.43 | 326.13 | 331.96 | 313.25 | 331.99 | 331.99 |
| C101 (25)                   | 223.95 | 298.81 | 320.06 | 317.55 | 455.22 | 459.53 | 391.99 | 459.16 | 459.51 |
| <b>Moderate Variability</b> |        |        |        |        |        |        |        |        |        |
| R101 (25)                   | 150.05 | 217.25 | 273.25 | 228.64 | 315.76 | 331.25 | 297.70 | 331.46 | 331.44 |
| C101 (25)                   | 217.42 | 293.51 | 319.60 | 309.09 | 434.16 | 457.82 | 383.98 | 456.40 | 459.03 |
| <b>High Variability</b>     |        |        |        |        |        |        |        |        |        |
| R101 (25)                   | 144.24 | 209.61 | 262.10 | 216.28 | 298.55 | 329.57 | 282.73 | 331.26 | 331.60 |
| C101 (25)                   | 204.12 | 280.42 | 313.28 | 298.80 | 406.95 | 453.89 | 372.92 | 453.72 | 459.44 |

**Table 15 Average Demand Served by Pre-Decision Rollout without Decomposition.**

| Duration Capacity           | short  |         |         | medium  |         |         | long    |         |         |
|-----------------------------|--------|---------|---------|---------|---------|---------|---------|---------|---------|
|                             | small  | medium  | large   | small   | medium  | large   | small   | medium  | large   |
| <b>Low Variability</b>      |        |         |         |         |         |         |         |         |         |
| R101 (25)                   | 156.26 | 221.93  | 278.66  | 237.90  | 325.84  | 332.01  | 311.81  | 332.02  | 332.04  |
| C101 (25)                   | 223.96 | 299.12  | 320.02  | 317.33  | 455.06  | 459.64  | 391.46  | 459.20  | 459.64  |
| R101 (50)                   | 360.36 | 501.27  | 633.27  | 523.93  | 716.84  | 721.05  | 665.88  | 721.12  | 721.15  |
| C101 (50)                   | 339.03 | 541.44  | 606.72  | 545.14  | 801.94  | 859.51  | 679.49  | 859.30  | 859.90  |
| R101 (75)                   | 595.10 | 833.97  | 1011.36 | 841.58  | 1077.78 | 1078.36 | 1038.53 | 1078.33 | 1078.40 |
| C101 (75)                   | 760.68 | 1099.12 | 1296.29 | 1073.93 | 1359.58 | 1359.95 | 1302.97 | 1360.04 | 1360.05 |
| R101 (100)                  | 809.01 | 1147.16 | 1378.49 | 1151.03 | 1457.79 | 1458.51 | 1394.95 | 1458.51 | 1458.60 |
| C101 (100)                  | 923.41 | 1351.02 | 1653.20 | 1307.92 | 1803.54 | 1810.80 | 1641.42 | 1810.73 | 1810.84 |
| <b>Moderate Variability</b> |        |         |         |         |         |         |         |         |         |
| R101 (25)                   | 149.56 | 217.19  | 273.16  | 226.34  | 314.28  | 331.14  | 295.52  | 331.55  | 331.61  |
| C101 (25)                   | 216.41 | 293.81  | 319.37  | 306.84  | 432.93  | 457.81  | 379.98  | 457.14  | 459.23  |
| R101 (50)                   | 334.09 | 488.27  | 611.12  | 502.21  | 695.38  | 720.29  | 636.21  | 720.39  | 720.48  |
| C101 (50)                   | 325.95 | 511.14  | 582.92  | 526.61  | 769.22  | 849.40  | 661.69  | 854.21  | 858.51  |
| R101 (75)                   | 566.23 | 794.36  | 966.11  | 808.58  | 1067.28 | 1077.22 | 997.48  | 1076.89 | 1077.49 |
| C101 (75)                   | 733.76 | 1057.77 | 1263.94 | 1040.89 | 1343.56 | 1357.70 | 1262.63 | 1360.01 | 1359.30 |
| R101 (100)                  | 772.73 | 1104.63 | 1329.75 | 1104.23 | 1443.13 | 1457.21 | 1348.52 | 1457.17 | 1457.35 |
| C101 (100)                  | 874.44 | 1306.45 | 1602.74 | 1275.16 | 1772.34 | 1808.53 | 1588.98 | 1809.20 | 1809.90 |
| <b>High Variability</b>     |        |         |         |         |         |         |         |         |         |
| R101 (25)                   | 142.26 | 204.10  | 262.11  | 215.13  | 297.57  | 329.66  | 280.96  | 331.29  | 331.70  |
| C101 (25)                   | 197.18 | 280.90  | 310.75  | 293.78  | 402.11  | 454.25  | 369.23  | 453.41  | 459.42  |
| R101 (50)                   | 318.30 | 465.63  | 577.69  | 482.19  | 662.14  | 715.88  | 611.38  | 715.40  | 716.93  |
| C101 (50)                   | 314.26 | 481.58  | 567.60  | 497.25  | 714.24  | 823.78  | 637.02  | 838.74  | 854.95  |
| R101 (75)                   | 527.42 | 760.55  | 912.62  | 775.51  | 1043.07 | 1075.38 | 967.65  | 1075.26 | 1075.63 |
| C101 (75)                   | 698.65 | 1014.63 | 1194.86 | 1004.76 | 1323.92 | 1359.87 | 1219.95 | 1358.94 | 1360.58 |
| R101 (100)                  | 726.77 | 1043.24 | 1255.35 | 1055.71 | 1410.60 | 1452.19 | 1308.35 | 1452.35 | 1452.86 |
| C101 (100)                  | 823.89 | 1240.74 | 1519.21 | 1228.86 | 1690.16 | 1800.91 | 1540.75 | 1803.63 | 1806.43 |

**Table 16 Average Demand Served by One-Step Rollout with Static Decomposition.**

| Duration<br>Capacity        | short  |         |         | medium  |         |         | long    |         |         |
|-----------------------------|--------|---------|---------|---------|---------|---------|---------|---------|---------|
|                             | small  | medium  | large   | small   | medium  | large   | small   | medium  | large   |
| <b>Low Variability</b>      |        |         |         |         |         |         |         |         |         |
| R101 (25)                   | 156.15 | 221.92  | 278.66  | 237.48  | 324.61  | 332.02  | 312.44  | 332.00  | 332.04  |
| C101 (25)                   | 223.21 | 299.03  | 320.02  | 317.15  | 454.97  | 459.62  | 391.12  | 459.16  | 458.63  |
| R101 (50)                   | 361.06 | 501.20  | 632.47  | 524.79  | 716.61  | 720.82  | 665.96  | 720.61  | 721.12  |
| C101 (50)                   | 337.89 | 541.34  | 606.40  | 544.09  | 801.50  | 859.40  | 677.36  | 858.79  | 859.79  |
| R101 (75)                   | 595.27 | 833.98  | 1010.95 | 841.91  | 1077.74 | 1078.25 | 1038.58 | 1078.05 | 1078.32 |
| C101 (75)                   | 759.02 | 1099.32 | 1293.81 | 1069.68 | 1359.04 | 1359.75 | 1300.23 | 1359.84 | 1359.39 |
| R101 (100)                  | 808.56 | 1146.77 | 1376.57 | 1151.22 | 1457.41 | 1458.44 | 1390.46 | 1457.07 | 1457.70 |
| C101 (100)                  | 921.66 | 1351.45 | 1648.26 | 1305.83 | 1802.51 | 1810.70 | 1633.05 | 1808.60 | 1810.75 |
| <b>Moderate Variability</b> |        |         |         |         |         |         |         |         |         |
| R101 (25)                   | 149.14 | 216.45  | 273.03  | 225.74  | 313.84  | 331.36  | 291.35  | 331.38  | 331.57  |
| C101 (25)                   | 213.35 | 293.13  | 319.30  | 301.30  | 428.45  | 457.56  | 372.77  | 455.80  | 458.79  |
| R101 (50)                   | 330.76 | 487.71  | 610.45  | 497.77  | 692.82  | 719.85  | 627.05  | 719.11  | 720.21  |
| C101 (50)                   | 322.62 | 506.19  | 581.84  | 512.61  | 765.82  | 846.61  | 650.12  | 850.88  | 858.04  |
| R101 (75)                   | 559.28 | 793.63  | 964.07  | 796.98  | 1056.98 | 1076.67 | 979.45  | 1075.99 | 1077.09 |
| C101 (75)                   | 717.12 | 1050.76 | 1255.85 | 1018.50 | 1333.84 | 1357.71 | 1230.97 | 1358.42 | 1359.18 |
| R101 (100)                  | 762.49 | 1101.67 | 1327.59 | 1083.46 | 1436.94 | 1454.81 | 1322.92 | 1455.44 | 1456.10 |
| C101 (100)                  | 848.78 | 1296.81 | 1585.45 | 1236.61 | 1749.06 | 1806.95 | 1542.51 | 1806.46 | 1808.22 |
| <b>High Variability</b>     |        |         |         |         |         |         |         |         |         |
| R101 (25)                   | 141.72 | 202.59  | 261.95  | 211.48  | 295.84  | 329.49  | 273.91  | 330.99  | 331.70  |
| C101 (25)                   | 184.92 | 273.26  | 306.92  | 282.41  | 396.96  | 449.91  | 350.63  | 447.88  | 458.88  |
| R101 (50)                   | 311.61 | 460.42  | 573.24  | 467.87  | 652.49  | 713.76  | 587.35  | 713.44  | 716.50  |
| C101 (50)                   | 303.60 | 474.69  | 559.41  | 472.80  | 695.75  | 818.90  | 605.78  | 820.74  | 854.02  |
| R101 (75)                   | 511.15 | 755.01  | 902.86  | 750.05  | 1025.99 | 1074.12 | 927.64  | 1073.57 | 1075.21 |
| C101 (75)                   | 659.67 | 980.17  | 1177.51 | 952.99  | 1292.50 | 1357.29 | 1147.05 | 1356.11 | 1359.84 |
| R101 (100)                  | 703.45 | 1024.66 | 1245.35 | 1013.06 | 1381.31 | 1449.82 | 1242.80 | 1449.52 | 1451.27 |
| C101 (100)                  | 782.55 | 1212.71 | 1482.56 | 1155.57 | 1637.88 | 1794.12 | 1445.07 | 1789.60 | 1805.35 |

**Table 17 Average Demand Served by Post-Decision Rollout with Static Decomposition.**

| Duration<br>Capacity        | short  |         |         | medium  |         |         | long    |         |         |
|-----------------------------|--------|---------|---------|---------|---------|---------|---------|---------|---------|
|                             | small  | medium  | large   | small   | medium  | large   | small   | medium  | large   |
| <b>Low Variability</b>      |        |         |         |         |         |         |         |         |         |
| R101 (25)                   | 156.15 | 221.93  | 278.66  | 237.48  | 325.70  | 332.02  | 312.44  | 331.94  | 332.04  |
| C101 (25)                   | 223.21 | 299.03  | 320.02  | 317.15  | 454.98  | 459.58  | 391.12  | 459.12  | 458.57  |
| R101 (50)                   | 361.06 | 501.20  | 632.47  | 524.79  | 716.61  | 720.82  | 665.96  | 720.99  | 720.62  |
| C101 (50)                   | 337.89 | 541.34  | 606.40  | 544.09  | 801.38  | 859.50  | 677.37  | 859.02  | 859.76  |
| R101 (75)                   | 595.27 | 833.98  | 1010.95 | 842.56  | 1077.66 | 1078.29 | 1038.79 | 1078.15 | 1078.27 |
| C101 (75)                   | 759.02 | 1099.32 | 1293.78 | 1069.94 | 1359.09 | 1359.98 | 1300.37 | 1358.44 | 1360.03 |
| R101 (100)                  | 808.56 | 1146.77 | 1376.60 | 1151.18 | 1457.37 | 1458.16 | 1390.30 | 1457.50 | 1458.49 |
| C101 (100)                  | 921.66 | 1351.45 | 1648.07 | 1305.73 | 1802.29 | 1810.66 | 1633.37 | 1808.98 | 1810.75 |
| <b>Moderate Variability</b> |        |         |         |         |         |         |         |         |         |
| R101 (25)                   | 149.14 | 216.46  | 273.03  | 225.74  | 313.84  | 331.36  | 291.35  | 331.29  | 331.61  |
| C101 (25)                   | 213.35 | 293.13  | 319.30  | 301.99  | 428.41  | 457.56  | 372.73  | 456.17  | 458.83  |
| R101 (50)                   | 330.80 | 487.55  | 610.44  | 498.23  | 692.82  | 720.00  | 627.06  | 719.60  | 720.09  |
| C101 (50)                   | 322.62 | 506.20  | 581.84  | 512.55  | 766.04  | 846.51  | 650.26  | 851.05  | 858.06  |
| R101 (75)                   | 559.30 | 793.62  | 963.81  | 797.00  | 1060.46 | 1076.91 | 979.57  | 1075.92 | 1077.17 |
| C101 (75)                   | 716.97 | 1050.79 | 1256.26 | 1018.58 | 1334.31 | 1357.44 | 1231.02 | 1358.52 | 1358.87 |
| R101 (100)                  | 762.46 | 1101.73 | 1327.62 | 1083.40 | 1437.01 | 1454.85 | 1322.90 | 1456.24 | 1456.87 |
| C101 (100)                  | 848.76 | 1297.51 | 1585.52 | 1236.66 | 1749.13 | 1806.78 | 1543.16 | 1805.93 | 1808.94 |
| <b>High Variability</b>     |        |         |         |         |         |         |         |         |         |
| R101 (25)                   | 141.61 | 202.59  | 261.95  | 211.53  | 295.83  | 329.48  | 274.35  | 330.83  | 331.65  |
| C101 (25)                   | 184.92 | 273.26  | 306.66  | 282.58  | 396.98  | 449.91  | 350.04  | 447.94  | 458.71  |
| R101 (50)                   | 311.61 | 460.05  | 573.25  | 468.02  | 652.28  | 713.81  | 587.48  | 713.93  | 716.66  |
| C101 (50)                   | 303.61 | 474.69  | 559.41  | 473.06  | 695.80  | 818.85  | 605.93  | 821.91  | 854.47  |
| R101 (75)                   | 511.88 | 755.04  | 902.75  | 750.08  | 1026.37 | 1073.19 | 927.87  | 1074.06 | 1075.40 |
| C101 (75)                   | 660.28 | 980.08  | 1177.96 | 952.96  | 1292.65 | 1357.15 | 1147.23 | 1355.91 | 1359.87 |
| R101 (100)                  | 703.36 | 1024.52 | 1245.39 | 1013.38 | 1381.14 | 1450.04 | 1242.27 | 1449.50 | 1452.09 |
| C101 (100)                  | 782.91 | 1213.56 | 1482.57 | 1155.47 | 1638.17 | 1794.57 | 1445.17 | 1789.79 | 1805.59 |

**Table 18 Average Demand Served by Pre-Decision Rollout with Static Decomposition.**

| Duration Capacity           | short  |         |         | medium  |         |         | long    |         |         |
|-----------------------------|--------|---------|---------|---------|---------|---------|---------|---------|---------|
|                             | small  | medium  | large   | small   | medium  | large   | small   | medium  | large   |
| <b>Low Variability</b>      |        |         |         |         |         |         |         |         |         |
| R101 (25)                   | 156.15 | 221.93  | 278.66  | 236.90  | 325.38  | 332.01  | 308.01  | 331.98  | 332.04  |
| C101 (25)                   | 222.21 | 298.74  | 320.02  | 317.07  | 454.56  | 459.44  | 391.09  | 459.16  | 459.64  |
| R101 (50)                   | 354.92 | 501.20  | 632.47  | 520.38  | 716.59  | 721.04  | 661.69  | 720.78  | 721.15  |
| C101 (50)                   | 336.73 | 541.30  | 606.40  | 543.51  | 801.22  | 859.28  | 676.47  | 858.92  | 859.87  |
| R101 (75)                   | 593.76 | 831.77  | 1010.24 | 837.70  | 1077.39 | 1078.20 | 1034.26 | 1076.78 | 1078.23 |
| C101 (75)                   | 756.57 | 1097.16 | 1294.36 | 1067.83 | 1357.99 | 1359.55 | 1299.86 | 1359.45 | 1360.05 |
| R101 (100)                  | 803.42 | 1146.33 | 1376.46 | 1140.98 | 1456.67 | 1458.09 | 1383.69 | 1455.94 | 1458.47 |
| C101 (100)                  | 918.79 | 1349.53 | 1648.26 | 1304.85 | 1801.67 | 1810.42 | 1629.44 | 1808.90 | 1810.35 |
| <b>Moderate Variability</b> |        |         |         |         |         |         |         |         |         |
| R101 (25)                   | 147.51 | 215.87  | 273.03  | 223.22  | 312.90  | 330.76  | 287.98  | 331.09  | 331.61  |
| C101 (25)                   | 207.58 | 292.59  | 319.06  | 300.68  | 425.49  | 457.50  | 372.25  | 455.67  | 459.01  |
| R101 (50)                   | 329.95 | 486.24  | 610.00  | 494.30  | 690.85  | 719.14  | 619.45  | 718.78  | 720.22  |
| C101 (50)                   | 322.04 | 505.71  | 581.77  | 507.68  | 764.40  | 846.26  | 644.36  | 850.36  | 856.92  |
| R101 (75)                   | 558.08 | 791.92  | 962.29  | 793.13  | 1059.74 | 1075.92 | 975.12  | 1074.56 | 1076.54 |
| C101 (75)                   | 711.85 | 1046.57 | 1252.74 | 1015.24 | 1334.17 | 1356.72 | 1228.61 | 1357.86 | 1359.02 |
| R101 (100)                  | 755.10 | 1094.05 | 1326.28 | 1078.36 | 1435.19 | 1455.73 | 1313.87 | 1454.19 | 1455.65 |
| C101 (100)                  | 842.98 | 1292.65 | 1580.31 | 1228.41 | 1748.60 | 1805.63 | 1539.07 | 1804.63 | 1808.80 |
| <b>High Variability</b>     |        |         |         |         |         |         |         |         |         |
| R101 (25)                   | 140.81 | 202.59  | 261.95  | 208.50  | 291.96  | 328.16  | 270.53  | 328.45  | 331.53  |
| C101 (25)                   | 184.90 | 272.76  | 306.58  | 280.31  | 395.29  | 448.86  | 347.76  | 447.75  | 458.80  |
| R101 (50)                   | 309.47 | 458.77  | 571.84  | 461.48  | 651.86  | 712.95  | 581.60  | 712.59  | 716.59  |
| C101 (50)                   | 303.09 | 474.69  | 559.07  | 469.85  | 694.75  | 818.23  | 602.67  | 820.53  | 854.34  |
| R101 (75)                   | 508.81 | 752.50  | 902.11  | 747.06  | 1024.07 | 1070.85 | 923.77  | 1070.62 | 1075.17 |
| C101 (75)                   | 656.07 | 978.99  | 1178.08 | 951.21  | 1290.25 | 1355.54 | 1144.80 | 1355.09 | 1359.74 |
| R101 (100)                  | 697.32 | 1020.06 | 1240.32 | 1006.87 | 1379.15 | 1449.18 | 1235.95 | 1447.70 | 1450.07 |
| C101 (100)                  | 778.98 | 1207.66 | 1481.80 | 1149.89 | 1634.19 | 1792.21 | 1439.30 | 1786.81 | 1803.95 |

**Table 19 Average Demand Served by One-Step Rollout with Dynamic Decomposition.**

| Duration Capacity           | short  |         |         | medium  |         |         | long    |         |         |
|-----------------------------|--------|---------|---------|---------|---------|---------|---------|---------|---------|
|                             | small  | medium  | large   | small   | medium  | large   | small   | medium  | large   |
| <b>Low Variability</b>      |        |         |         |         |         |         |         |         |         |
| R101 (25)                   | 156.26 | 221.93  | 278.66  | 237.91  | 324.65  | 332.00  | 312.06  | 332.01  | 332.04  |
| C101 (25)                   | 223.96 | 299.13  | 320.02  | 317.34  | 455.06  | 459.39  | 391.48  | 459.22  | 459.64  |
| R101 (50)                   | 360.62 | 501.27  | 633.27  | 524.58  | 717.17  | 720.82  | 665.42  | 720.64  | 721.09  |
| C101 (50)                   | 338.90 | 541.54  | 606.70  | 545.29  | 802.21  | 859.47  | 679.27  | 859.24  | 859.88  |
| R101 (75)                   | 595.93 | 833.95  | 1011.37 | 842.86  | 1077.53 | 1078.36 | 1038.96 | 1078.29 | 1078.41 |
| C101 (75)                   | 760.24 | 1099.10 | 1296.55 | 1073.61 | 1358.71 | 1359.95 | 1302.98 | 1360.04 | 1359.87 |
| R101 (100)                  | 809.26 | 1146.99 | 1378.23 | 1152.07 | 1457.97 | 1458.49 | 1395.44 | 1458.42 | 1458.47 |
| C101 (100)                  | 924.38 | 1351.11 | 1652.68 | 1308.30 | 1802.98 | 1810.80 | 1641.20 | 1809.85 | 1810.84 |
| <b>Moderate Variability</b> |        |         |         |         |         |         |         |         |         |
| R101 (25)                   | 149.49 | 217.08  | 273.16  | 226.86  | 314.36  | 331.17  | 295.05  | 331.52  | 331.57  |
| C101 (25)                   | 215.94 | 293.74  | 319.37  | 306.74  | 433.03  | 457.86  | 380.40  | 457.17  | 459.14  |
| R101 (50)                   | 334.04 | 488.17  | 611.01  | 502.73  | 695.75  | 720.12  | 637.41  | 720.33  | 720.45  |
| C101 (50)                   | 326.30 | 510.72  | 583.03  | 526.61  | 769.64  | 849.31  | 662.60  | 854.34  | 858.48  |
| R101 (75)                   | 566.63 | 794.68  | 966.15  | 808.57  | 1066.94 | 1077.20 | 998.59  | 1076.89 | 1077.51 |
| C101 (75)                   | 733.12 | 1057.90 | 1262.07 | 1041.38 | 1343.45 | 1358.43 | 1262.33 | 1359.95 | 1359.28 |
| R101 (100)                  | 773.95 | 1104.09 | 1329.71 | 1104.91 | 1443.21 | 1457.12 | 1350.17 | 1456.78 | 1457.26 |
| C101 (100)                  | 874.35 | 1307.04 | 1604.17 | 1276.08 | 1771.71 | 1808.70 | 1588.60 | 1809.21 | 1809.32 |
| <b>High Variability</b>     |        |         |         |         |         |         |         |         |         |
| R101 (25)                   | 142.77 | 204.63  | 262.10  | 215.22  | 297.58  | 329.67  | 280.81  | 331.21  | 331.71  |
| C101 (25)                   | 197.51 | 279.81  | 310.26  | 294.43  | 402.09  | 454.42  | 370.05  | 453.42  | 459.13  |
| R101 (50)                   | 318.58 | 465.76  | 577.74  | 481.49  | 661.06  | 715.64  | 611.88  | 715.34  | 716.78  |
| C101 (50)                   | 314.75 | 480.92  | 566.90  | 497.17  | 714.13  | 823.67  | 636.53  | 838.27  | 854.87  |
| R101 (75)                   | 527.53 | 760.43  | 913.53  | 776.31  | 1043.61 | 1075.30 | 967.97  | 1075.28 | 1075.60 |
| C101 (75)                   | 698.54 | 1013.12 | 1196.75 | 1005.66 | 1323.96 | 1359.76 | 1220.91 | 1358.80 | 1360.57 |
| R101 (100)                  | 728.58 | 1043.41 | 1261.03 | 1053.92 | 1410.86 | 1451.80 | 1309.60 | 1452.25 | 1452.65 |
| C101 (100)                  | 822.45 | 1239.57 | 1520.27 | 1227.91 | 1688.28 | 1800.60 | 1540.32 | 1803.11 | 1806.46 |

Table 20 Average Demand Served by Post-Decision Rollout with Dynamic Decomposition.

| Duration<br>Capacity        | short  |         |         | medium  |         |         | long    |         |         |
|-----------------------------|--------|---------|---------|---------|---------|---------|---------|---------|---------|
|                             | small  | medium  | large   | small   | medium  | large   | small   | medium  | large   |
| <b>Low Variability</b>      |        |         |         |         |         |         |         |         |         |
| R101 (25)                   | 156.26 | 221.93  | 278.66  | 237.91  | 325.84  | 332.00  | 311.63  | 331.99  | 332.04  |
| C101 (25)                   | 223.96 | 299.13  | 320.02  | 317.38  | 455.06  | 459.63  | 391.46  | 459.18  | 459.64  |
| R101 (50)                   | 359.02 | 501.27  | 633.27  | 524.66  | 717.17  | 720.83  | 665.88  | 721.07  | 721.15  |
| C101 (50)                   | 339.09 | 541.50  | 606.69  | 545.36  | 801.51  | 859.55  | 679.14  | 859.33  | 859.92  |
| R101 (75)                   | 595.84 | 833.94  | 1011.38 | 842.77  | 1077.51 | 1078.40 | 1039.19 | 1078.35 | 1078.39 |
| C101 (75)                   | 760.51 | 1099.63 | 1296.00 | 1073.95 | 1359.68 | 1359.98 | 1303.15 | 1360.04 | 1360.05 |
| R101 (100)                  | 809.53 | 1146.83 | 1378.29 | 1151.75 | 1457.83 | 1458.52 | 1394.86 | 1458.23 | 1458.60 |
| C101 (100)                  | 923.33 | 1351.62 | 1652.40 | 1308.04 | 1803.19 | 1810.77 | 1641.75 | 1810.08 | 1810.84 |
| <b>Moderate Variability</b> |        |         |         |         |         |         |         |         |         |
| R101 (25)                   | 149.61 | 217.27  | 273.13  | 226.70  | 314.25  | 331.26  | 295.36  | 331.50  | 331.61  |
| C101 (25)                   | 216.23 | 293.76  | 319.37  | 307.00  | 433.40  | 457.77  | 380.83  | 456.67  | 459.10  |
| R101 (50)                   | 334.25 | 487.99  | 611.33  | 503.13  | 695.85  | 720.29  | 636.56  | 720.38  | 720.39  |
| C101 (50)                   | 326.39 | 510.74  | 583.04  | 526.77  | 769.51  | 849.54  | 661.61  | 854.37  | 858.52  |
| R101 (75)                   | 566.48 | 794.78  | 965.82  | 809.52  | 1067.65 | 1077.28 | 998.05  | 1076.97 | 1077.52 |
| C101 (75)                   | 733.84 | 1057.77 | 1262.30 | 1040.91 | 1343.26 | 1357.55 | 1263.19 | 1359.97 | 1359.30 |
| R101 (100)                  | 774.60 | 1104.69 | 1329.85 | 1105.01 | 1442.80 | 1457.00 | 1349.28 | 1457.16 | 1457.33 |
| C101 (100)                  | 874.77 | 1307.01 | 1603.55 | 1276.48 | 1771.09 | 1808.20 | 1589.01 | 1808.83 | 1809.89 |
| <b>High Variability</b>     |        |         |         |         |         |         |         |         |         |
| R101 (25)                   | 142.74 | 204.30  | 262.06  | 214.86  | 297.55  | 329.60  | 280.97  | 331.21  | 331.71  |
| C101 (25)                   | 197.82 | 281.34  | 310.66  | 293.88  | 402.64  | 454.85  | 369.72  | 453.37  | 459.39  |
| R101 (50)                   | 318.41 | 465.72  | 577.62  | 482.15  | 661.29  | 715.81  | 611.32  | 715.35  | 716.91  |
| C101 (50)                   | 314.61 | 481.46  | 567.79  | 497.38  | 713.01  | 824.45  | 636.96  | 838.04  | 854.95  |
| R101 (75)                   | 528.21 | 760.66  | 913.60  | 776.42  | 1043.18 | 1075.35 | 968.30  | 1075.28 | 1075.59 |
| C101 (75)                   | 698.57 | 1013.16 | 1196.04 | 1005.96 | 1323.39 | 1359.85 | 1220.65 | 1358.81 | 1360.58 |
| R101 (100)                  | 727.21 | 1043.20 | 1258.31 | 1056.54 | 1412.06 | 1451.90 | 1309.02 | 1452.23 | 1452.83 |
| C101 (100)                  | 823.56 | 1239.84 | 1518.80 | 1230.54 | 1689.25 | 1800.98 | 1541.30 | 1803.36 | 1806.46 |

Table 21 Average Demand Served by Pre-Decision Rollout with Dynamic Decomposition.

| Duration<br>Capacity        | short  |         |         | medium  |         |         | long    |         |         |
|-----------------------------|--------|---------|---------|---------|---------|---------|---------|---------|---------|
|                             | small  | medium  | large   | small   | medium  | large   | small   | medium  | large   |
| <b>Low Variability</b>      |        |         |         |         |         |         |         |         |         |
| R101 (25)                   | 156.26 | 221.93  | 278.66  | 237.90  | 325.84  | 332.01  | 311.75  | 332.02  | 332.04  |
| C101 (25)                   | 223.96 | 299.13  | 320.02  | 317.46  | 455.06  | 459.63  | 391.47  | 459.22  | 459.64  |
| R101 (50)                   | 359.21 | 501.27  | 633.27  | 524.09  | 716.86  | 721.05  | 665.75  | 721.08  | 721.15  |
| C101 (50)                   | 339.47 | 541.44  | 606.69  | 545.18  | 801.94  | 859.51  | 679.33  | 859.31  | 859.90  |
| R101 (75)                   | 595.51 | 833.92  | 1011.44 | 841.94  | 1077.82 | 1078.35 | 1038.42 | 1078.28 | 1078.41 |
| C101 (75)                   | 760.65 | 1099.16 | 1296.11 | 1073.93 | 1359.56 | 1359.95 | 1302.97 | 1360.04 | 1360.05 |
| R101 (100)                  | 809.33 | 1147.04 | 1378.25 | 1151.18 | 1457.89 | 1458.50 | 1395.29 | 1458.53 | 1458.60 |
| C101 (100)                  | 923.63 | 1351.49 | 1653.11 | 1307.86 | 1803.39 | 1810.77 | 1642.03 | 1810.73 | 1810.84 |
| <b>Moderate Variability</b> |        |         |         |         |         |         |         |         |         |
| R101 (25)                   | 149.39 | 216.77  | 273.16  | 226.17  | 314.29  | 331.39  | 295.31  | 331.54  | 331.61  |
| C101 (25)                   | 216.38 | 293.81  | 319.35  | 306.87  | 433.79  | 457.76  | 379.54  | 457.04  | 459.23  |
| R101 (50)                   | 333.92 | 488.15  | 611.06  | 502.65  | 696.01  | 720.36  | 635.98  | 720.39  | 720.47  |
| C101 (50)                   | 326.27 | 511.21  | 582.85  | 526.21  | 769.39  | 849.37  | 661.36  | 854.33  | 858.52  |
| R101 (75)                   | 566.21 | 794.35  | 966.37  | 808.44  | 1067.50 | 1077.27 | 997.67  | 1076.78 | 1077.49 |
| C101 (75)                   | 733.26 | 1058.98 | 1263.53 | 1040.80 | 1343.30 | 1357.73 | 1263.66 | 1360.02 | 1359.30 |
| R101 (100)                  | 773.23 | 1104.25 | 1329.93 | 1103.67 | 1443.20 | 1457.20 | 1348.84 | 1457.18 | 1457.34 |
| C101 (100)                  | 873.76 | 1306.69 | 1602.97 | 1275.28 | 1772.29 | 1808.49 | 1589.20 | 1809.13 | 1809.89 |
| <b>High Variability</b>     |        |         |         |         |         |         |         |         |         |
| R101 (25)                   | 142.18 | 204.14  | 262.06  | 214.97  | 297.53  | 329.69  | 280.67  | 331.30  | 331.70  |
| C101 (25)                   | 197.57 | 281.16  | 310.74  | 294.00  | 401.96  | 454.70  | 368.89  | 453.32  | 459.39  |
| R101 (50)                   | 318.66 | 465.91  | 577.92  | 481.72  | 661.64  | 715.80  | 610.90  | 715.50  | 716.93  |
| C101 (50)                   | 314.21 | 480.98  | 567.51  | 497.66  | 714.06  | 824.24  | 636.36  | 837.93  | 854.92  |
| R101 (75)                   | 527.92 | 761.19  | 912.93  | 775.31  | 1042.71 | 1075.15 | 967.25  | 1075.28 | 1075.63 |
| C101 (75)                   | 698.64 | 1014.01 | 1194.19 | 1004.33 | 1324.46 | 1359.92 | 1219.75 | 1358.74 | 1360.58 |
| R101 (100)                  | 727.80 | 1043.31 | 1256.91 | 1053.96 | 1411.22 | 1452.23 | 1308.12 | 1452.36 | 1452.86 |
| C101 (100)                  | 824.09 | 1240.64 | 1519.84 | 1228.25 | 1690.97 | 1800.92 | 1539.82 | 1803.69 | 1806.45 |

**Table 22 Average CPU Seconds Per Instance.**

| Method                       | 25 Customers<br>Avg. CPU | 50 Customers<br>Avg. CPU | 75 Customers<br>Avg. CPU | 100 Customers<br>Avg. CPU |
|------------------------------|--------------------------|--------------------------|--------------------------|---------------------------|
| <b>No Decomposition</b>      |                          |                          |                          |                           |
| One-Step Rollout             | 42.70                    | –                        | –                        | –                         |
| Post-Decision Rollout        | 9.14                     | –                        | –                        | –                         |
| Pre-Decision Rollout         | 0.45                     | 4.39                     | 26.02                    | 76.35                     |
| <b>Static Decomposition</b>  |                          |                          |                          |                           |
| One-Step Rollout             | 0.85                     | 5.29                     | 18.42                    | 30.82                     |
| Post-Decision Rollout        | 0.25                     | 0.89                     | 3.52                     | 6.11                      |
| Pre-Decision Rollout         | 0.01                     | 0.02                     | 0.02                     | 0.14                      |
| <b>Dynamic Decomposition</b> |                          |                          |                          |                           |
| One-Step Rollout             | 1.27                     | 9.60                     | 43.49                    | 104.81                    |
| Post-Decision Rollout        | 0.53                     | 5.29                     | 29.70                    | 81.75                     |
| Pre-Decision Rollout         | 0.41                     | 4.94                     | 27.94                    | 80.53                     |

**Table 23 Average Demand Served by One-Step Rollout with Random Heuristic and High Quality Initial Policy.**

| Duration<br>Capacity        | short  |        |        | medium |        |        | long   |        |        |
|-----------------------------|--------|--------|--------|--------|--------|--------|--------|--------|--------|
|                             | small  | medium | large  | small  | medium | large  | small  | medium | large  |
| <b>Low Variability</b>      |        |        |        |        |        |        |        |        |        |
| R101 (25)                   | 156.15 | 221.93 | 278.66 | 236.94 | 325.38 | 332.02 | 309.90 | 332.02 | 332.02 |
| C101 (25)                   | 222.73 | 298.98 | 320.02 | 317.07 | 454.86 | 459.62 | 391.13 | 459.17 | 459.37 |
| <b>Moderate Variability</b> |        |        |        |        |        |        |        |        |        |
| R101 (25)                   | 147.80 | 216.29 | 273.14 | 223.96 | 312.88 | 331.02 | 290.00 | 331.42 | 331.56 |
| C101 (25)                   | 210.10 | 292.63 | 319.24 | 301.72 | 429.32 | 457.58 | 375.99 | 457.67 | 459.03 |
| <b>High Variability</b>     |        |        |        |        |        |        |        |        |        |
| R101 (25)                   | 141.69 | 202.92 | 262.09 | 210.27 | 293.16 | 328.92 | 274.64 | 330.58 | 331.40 |
| C101 (25)                   | 185.77 | 273.41 | 309.12 | 283.66 | 399.24 | 452.93 | 360.26 | 450.94 | 459.37 |

**Table 24 Average Demand Served by Post-Decision Rollout with Random Heuristic and High Quality Initial Policy.**

| Duration<br>Capacity        | short  |        |        | medium |        |        | long   |        |        |
|-----------------------------|--------|--------|--------|--------|--------|--------|--------|--------|--------|
|                             | small  | medium | large  | small  | medium | large  | small  | medium | large  |
| <b>Low Variability</b>      |        |        |        |        |        |        |        |        |        |
| R101 (25)                   | 156.15 | 221.93 | 278.66 | 237.22 | 325.39 | 332.01 | 309.94 | 332.01 | 332.04 |
| C101 (25)                   | 222.44 | 299.07 | 320.02 | 317.10 | 454.86 | 459.64 | 391.11 | 459.20 | 459.64 |
| <b>Moderate Variability</b> |        |        |        |        |        |        |        |        |        |
| R101 (25)                   | 147.83 | 216.34 | 273.18 | 223.85 | 313.10 | 331.14 | 290.11 | 331.43 | 331.61 |
| C101 (25)                   | 211.77 | 292.83 | 319.23 | 302.32 | 431.09 | 457.73 | 376.07 | 457.78 | 459.21 |
| <b>High Variability</b>     |        |        |        |        |        |        |        |        |        |
| R101 (25)                   | 141.38 | 202.91 | 262.10 | 210.45 | 293.35 | 329.05 | 274.80 | 330.48 | 331.72 |
| C101 (25)                   | 186.01 | 274.23 | 308.90 | 284.19 | 399.34 | 453.02 | 360.41 | 451.21 | 459.57 |

**Table 25** Average Demand Served by Pre-Decision Rollout with Random Heuristic and High Quality Initial Policy.

| Duration Capacity           | short  |         |         | medium  |         |         | long    |         |         |
|-----------------------------|--------|---------|---------|---------|---------|---------|---------|---------|---------|
|                             | small  | medium  | large   | small   | medium  | large   | small   | medium  | large   |
| <b>Low Variability</b>      |        |         |         |         |         |         |         |         |         |
| R101 (25)                   | 156.15 | 221.93  | 278.66  | 236.91  | 325.40  | 332.01  | 310.46  | 332.00  | 332.04  |
| C101 (25)                   | 222.50 | 298.87  | 320.02  | 317.07  | 454.80  | 459.58  | 391.09  | 459.16  | 459.64  |
| R101 (50)                   | 355.49 | 501.20  | 632.47  | 520.38  | 716.59  | 721.04  | 662.16  | 720.93  | 721.15  |
| C101 (50)                   | 336.78 | 541.30  | 606.40  | 543.53  | 801.36  | 859.40  | 677.00  | 858.98  | 859.90  |
| R101 (75)                   | 593.76 | 831.77  | 1010.37 | 837.72  | 1077.56 | 1078.20 | 1034.31 | 1077.53 | 1078.27 |
| C101 (75)                   | 756.57 | 1097.16 | 1294.44 | 1067.95 | 1358.25 | 1359.85 | 1300.04 | 1359.80 | 1360.05 |
| R101 (100)                  | 804.14 | 1146.33 | 1376.46 | 1141.00 | 1456.94 | 1458.22 | 1383.87 | 1456.98 | 1458.53 |
| C101 (100)                  | 918.81 | 1349.53 | 1648.26 | 1304.86 | 1802.20 | 1810.47 | 1630.34 | 1809.80 | 1810.61 |
| <b>Moderate Variability</b> |        |         |         |         |         |         |         |         |         |
| R101 (25)                   | 147.75 | 216.06  | 273.03  | 223.32  | 312.92  | 330.94  | 288.49  | 331.43  | 331.61  |
| C101 (25)                   | 208.42 | 292.59  | 319.06  | 300.68  | 426.83  | 457.56  | 372.45  | 456.19  | 459.01  |
| R101 (50)                   | 329.98 | 486.24  | 610.11  | 494.38  | 690.87  | 719.51  | 620.26  | 719.44  | 720.33  |
| C101 (50)                   | 322.04 | 505.94  | 581.77  | 508.04  | 764.84  | 846.47  | 644.71  | 850.86  | 857.48  |
| R101 (75)                   | 558.12 | 791.91  | 962.35  | 793.13  | 1059.87 | 1076.42 | 975.88  | 1075.38 | 1077.00 |
| C101 (75)                   | 712.04 | 1046.65 | 1254.17 | 1015.28 | 1334.29 | 1357.07 | 1229.46 | 1358.65 | 1359.29 |
| R101 (100)                  | 755.12 | 1094.05 | 1326.28 | 1078.45 | 1435.32 | 1456.24 | 1314.21 | 1455.65 | 1456.35 |
| C101 (100)                  | 842.98 | 1293.06 | 1580.33 | 1229.09 | 1748.83 | 1806.67 | 1539.47 | 1805.71 | 1809.33 |
| <b>High Variability</b>     |        |         |         |         |         |         |         |         |         |
| R101 (25)                   | 140.97 | 202.59  | 261.95  | 208.99  | 292.06  | 328.26  | 271.25  | 329.60  | 331.66  |
| C101 (25)                   | 184.85 | 272.76  | 306.81  | 280.73  | 396.49  | 449.63  | 348.90  | 447.74  | 458.80  |
| R101 (50)                   | 310.13 | 458.79  | 571.85  | 461.85  | 652.44  | 713.25  | 582.86  | 713.09  | 716.71  |
| C101 (50)                   | 303.07 | 474.69  | 559.07  | 470.09  | 694.69  | 818.60  | 603.12  | 821.78  | 854.49  |
| R101 (75)                   | 508.81 | 752.55  | 902.19  | 747.24  | 1024.29 | 1071.62 | 924.26  | 1072.75 | 1075.40 |
| C101 (75)                   | 656.74 | 979.14  | 1178.18 | 951.59  | 1291.56 | 1356.21 | 1145.70 | 1355.89 | 1360.20 |
| R101 (100)                  | 697.34 | 1020.06 | 1241.22 | 1007.47 | 1379.15 | 1449.76 | 1236.36 | 1449.04 | 1451.56 |
| C101 (100)                  | 778.99 | 1207.71 | 1481.94 | 1149.98 | 1635.31 | 1792.85 | 1440.16 | 1788.52 | 1804.77 |

**Table 26** Average Demand Served by One-Step Rollout with Random Heuristic and Low Quality Initial Policy.

| Duration Capacity           | short  |        |        | medium |        |        | long   |        |        |
|-----------------------------|--------|--------|--------|--------|--------|--------|--------|--------|--------|
|                             | small  | medium | large  | small  | medium | large  | small  | medium | large  |
| <b>Low Variability</b>      |        |        |        |        |        |        |        |        |        |
| R101 (25)                   | 139.09 | 168.58 | 169.42 | 190.73 | 244.85 | 289.98 | 260.18 | 326.97 | 326.58 |
| C101 (25)                   | 189.90 | 247.86 | 262.84 | 276.43 | 373.01 | 417.69 | 354.41 | 456.08 | 459.62 |
| <b>Moderate Variability</b> |        |        |        |        |        |        |        |        |        |
| R101 (25)                   | 112.63 | 135.55 | 152.97 | 186.11 | 246.35 | 270.99 | 251.35 | 311.70 | 316.40 |
| C101 (25)                   | 154.81 | 243.66 | 276.90 | 266.50 | 379.16 | 431.17 | 340.90 | 445.31 | 458.88 |
| <b>High Variability</b>     |        |        |        |        |        |        |        |        |        |
| R101 (25)                   | 100.95 | 170.81 | 179.24 | 188.72 | 245.36 | 257.88 | 241.03 | 287.83 | 323.12 |
| C101 (25)                   | 158.74 | 232.32 | 280.97 | 246.18 | 347.93 | 426.73 | 343.58 | 443.89 | 459.32 |

**Table 27** Average Demand Served by Post-Decision Rollout with Random Heuristic and Low Quality Initial Policy.

| Duration Capacity           | short  |        |        | medium |        |        | long   |        |        |
|-----------------------------|--------|--------|--------|--------|--------|--------|--------|--------|--------|
|                             | small  | medium | large  | small  | medium | large  | small  | medium | large  |
| <b>Low Variability</b>      |        |        |        |        |        |        |        |        |        |
| R101 (25)                   | 126.12 | 137.59 | 193.97 | 188.98 | 253.47 | 278.00 | 255.24 | 295.16 | 318.62 |
| C101 (25)                   | 185.84 | 240.37 | 289.01 | 271.56 | 369.29 | 410.34 | 336.86 | 449.41 | 459.62 |
| <b>Moderate Variability</b> |        |        |        |        |        |        |        |        |        |
| R101 (25)                   | 91.18  | 127.39 | 148.32 | 192.46 | 245.93 | 246.68 | 259.27 | 310.94 | 323.72 |
| C101 (25)                   | 163.31 | 253.83 | 290.97 | 265.91 | 342.53 | 422.83 | 340.15 | 454.18 | 459.03 |
| <b>High Variability</b>     |        |        |        |        |        |        |        |        |        |
| R101 (25)                   | 101.85 | 166.06 | 166.89 | 183.73 | 239.83 | 220.32 | 236.24 | 298.86 | 314.73 |
| C101 (25)                   | 159.38 | 236.36 | 263.47 | 249.39 | 356.71 | 417.08 | 340.84 | 444.31 | 457.93 |

**Table 28 Average Demand Served by Pre-Decision Rollout with Random Heuristic and Low Quality Initial Policy.**

| Duration Capacity           | short  |        |        | medium |         |         | long    |         |         |
|-----------------------------|--------|--------|--------|--------|---------|---------|---------|---------|---------|
|                             | small  | medium | large  | small  | medium  | large   | small   | medium  | large   |
| <b>Low Variability</b>      |        |        |        |        |         |         |         |         |         |
| R101 (25)                   | 132.49 | 77.98  | 104.23 | 163.12 | 216.48  | 224.66  | 216.99  | 272.08  | 245.45  |
| C101 (25)                   | 137.04 | 218.49 | 199.25 | 231.91 | 286.66  | 324.77  | 326.13  | 394.40  | 443.70  |
| R101 (50)                   | 187.98 | 216.38 | 265.55 | 360.56 | 389.52  | 491.52  | 445.27  | 546.92  | 623.13  |
| C101 (50)                   | 212.07 | 181.01 | 284.95 | 375.63 | 467.39  | 467.38  | 495.42  | 691.06  | 603.31  |
| R101 (75)                   | 308.03 | 480.77 | 435.88 | 473.39 | 695.16  | 685.40  | 685.02  | 924.14  | 969.37  |
| C101 (75)                   | 435.31 | 549.71 | 624.06 | 747.64 | 946.05  | 1044.58 | 892.97  | 1117.04 | 1160.22 |
| R101 (100)                  | 337.06 | 471.57 | 586.29 | 752.75 | 882.84  | 999.21  | 954.10  | 1190.77 | 1166.73 |
| C101 (100)                  | 474.52 | 726.02 | 805.69 | 824.94 | 1032.82 | 1138.58 | 1204.42 | 1453.58 | 1504.07 |
| <b>Moderate Variability</b> |        |        |        |        |         |         |         |         |         |
| R101 (25)                   | 81.07  | 74.75  | 111.93 | 166.40 | 220.70  | 179.95  | 233.24  | 284.11  | 297.09  |
| C101 (25)                   | 135.26 | 201.33 | 220.90 | 212.64 | 333.83  | 354.06  | 286.33  | 415.91  | 451.18  |
| R101 (50)                   | 171.99 | 236.66 | 203.52 | 342.53 | 427.08  | 479.16  | 461.59  | 571.25  | 591.48  |
| C101 (50)                   | 219.97 | 249.54 | 293.23 | 298.28 | 417.91  | 470.09  | 478.70  | 643.59  | 678.04  |
| R101 (75)                   | 268.20 | 372.73 | 395.50 | 567.14 | 657.78  | 653.89  | 744.66  | 826.53  | 905.17  |
| C101 (75)                   | 437.69 | 511.63 | 595.78 | 710.68 | 854.67  | 1005.56 | 862.55  | 1120.36 | 1261.56 |
| R101 (100)                  | 394.49 | 525.11 | 510.02 | 713.52 | 828.37  | 914.20  | 999.79  | 1113.42 | 1217.49 |
| C101 (100)                  | 523.86 | 617.50 | 726.19 | 804.05 | 1016.49 | 1054.15 | 1119.80 | 1338.11 | 1542.41 |
| <b>High Variability</b>     |        |        |        |        |         |         |         |         |         |
| R101 (25)                   | 79.08  | 129.83 | 139.10 | 167.03 | 197.55  | 182.61  | 214.58  | 207.26  | 293.00  |
| C101 (25)                   | 110.70 | 170.16 | 209.18 | 207.85 | 296.98  | 358.54  | 276.35  | 385.09  | 433.66  |
| R101 (50)                   | 202.57 | 184.22 | 280.36 | 275.26 | 373.05  | 396.64  | 437.18  | 538.64  | 584.31  |
| C101 (50)                   | 162.30 | 244.79 | 279.43 | 332.22 | 437.33  | 464.68  | 464.95  | 586.77  | 658.86  |
| R101 (75)                   | 299.76 | 397.22 | 376.09 | 478.67 | 663.89  | 707.77  | 706.95  | 843.65  | 926.92  |
| C101 (75)                   | 357.11 | 570.48 | 595.11 | 641.05 | 951.79  | 902.88  | 881.27  | 1069.45 | 1203.04 |
| R101 (100)                  | 382.19 | 491.48 | 525.51 | 634.02 | 870.38  | 919.92  | 829.12  | 1075.07 | 1222.25 |
| C101 (100)                  | 444.63 | 646.63 | 682.38 | 795.93 | 906.18  | 1117.25 | 1080.73 | 1351.25 | 1430.15 |

**Table 29 Average Demand Served by One-Step Rollout with Local Search Heuristic and Low Quality Initial Policy.**

| Duration Capacity           | short  |        |        | medium |        |        | long   |        |        |
|-----------------------------|--------|--------|--------|--------|--------|--------|--------|--------|--------|
|                             | small  | medium | large  | small  | medium | large  | small  | medium | large  |
| <b>Low Variability</b>      |        |        |        |        |        |        |        |        |        |
| R101 (25)                   | 143.27 | 196.03 | 223.80 | 234.87 | 308.25 | 330.77 | 300.39 | 331.97 | 332.01 |
| C101 (25)                   | 205.03 | 298.21 | 299.93 | 314.54 | 434.60 | 459.46 | 385.14 | 458.64 | 459.63 |
| <b>Moderate Variability</b> |        |        |        |        |        |        |        |        |        |
| R101 (25)                   | 118.54 | 182.24 | 204.84 | 222.41 | 303.68 | 325.51 | 292.93 | 330.84 | 331.53 |
| C101 (25)                   | 177.14 | 280.73 | 300.48 | 303.80 | 422.86 | 457.47 | 374.57 | 458.70 | 458.83 |
| <b>High Variability</b>     |        |        |        |        |        |        |        |        |        |
| R101 (25)                   | 107.49 | 195.91 | 231.09 | 215.13 | 292.32 | 312.10 | 276.51 | 329.93 | 331.67 |
| C101 (25)                   | 175.81 | 268.90 | 312.72 | 281.40 | 403.86 | 451.71 | 371.73 | 452.08 | 459.98 |

**Table 30 Average Demand Served by Post-Decision Rollout with Local Search Heuristic and Low Quality Initial Policy.**

| Duration Capacity           | short  |        |        | medium |        |        | long   |        |        |
|-----------------------------|--------|--------|--------|--------|--------|--------|--------|--------|--------|
|                             | small  | medium | large  | small  | medium | large  | small  | medium | large  |
| <b>Low Variability</b>      |        |        |        |        |        |        |        |        |        |
| R101 (25)                   | 142.79 | 194.18 | 229.62 | 236.85 | 310.32 | 331.39 | 304.89 | 331.79 | 331.99 |
| C101 (25)                   | 200.83 | 298.86 | 300.00 | 315.45 | 443.74 | 459.46 | 380.81 | 458.98 | 459.63 |
| <b>Moderate Variability</b> |        |        |        |        |        |        |        |        |        |
| R101 (25)                   | 119.71 | 183.46 | 209.10 | 225.48 | 303.95 | 324.44 | 292.20 | 331.11 | 331.45 |
| C101 (25)                   | 178.39 | 276.65 | 300.91 | 305.62 | 421.20 | 457.77 | 376.11 | 458.81 | 458.93 |
| <b>High Variability</b>     |        |        |        |        |        |        |        |        |        |
| R101 (25)                   | 108.86 | 195.70 | 230.28 | 213.80 | 292.57 | 312.01 | 274.58 | 330.00 | 331.57 |
| C101 (25)                   | 175.06 | 266.28 | 311.26 | 281.27 | 402.46 | 451.32 | 370.07 | 452.58 | 459.97 |

**Table 31** Average Demand Served by Pre-Decision Rollout with Local Search Heuristic and Low Quality Initial Policy.

| Duration Capacity           | short  |         |         | medium  |         |         | long    |         |         |
|-----------------------------|--------|---------|---------|---------|---------|---------|---------|---------|---------|
|                             | small  | medium  | large   | small   | medium  | large   | small   | medium  | large   |
| <b>Low Variability</b>      |        |         |         |         |         |         |         |         |         |
| R101 (25)                   | 139.12 | 196.21  | 209.85  | 216.80  | 284.09  | 316.94  | 295.26  | 331.98  | 332.01  |
| C101 (25)                   | 195.26 | 268.85  | 270.05  | 297.50  | 416.17  | 459.29  | 377.46  | 458.31  | 459.62  |
| R101 (50)                   | 293.22 | 408.92  | 542.69  | 495.48  | 681.97  | 694.70  | 623.17  | 720.31  | 720.87  |
| C101 (50)                   | 299.39 | 487.07  | 588.08  | 505.89  | 709.19  | 775.02  | 646.59  | 855.10  | 859.34  |
| R101 (75)                   | 521.87 | 728.68  | 864.26  | 777.35  | 1061.76 | 1059.13 | 964.02  | 1078.04 | 1074.09 |
| C101 (75)                   | 677.68 | 1011.09 | 1188.52 | 992.54  | 1343.31 | 1359.41 | 1252.69 | 1359.07 | 1360.05 |
| R101 (100)                  | 653.48 | 1005.22 | 1246.72 | 1049.08 | 1425.87 | 1456.45 | 1313.18 | 1458.41 | 1458.57 |
| C101 (100)                  | 754.43 | 1199.32 | 1452.48 | 1195.40 | 1691.50 | 1787.66 | 1537.69 | 1810.41 | 1810.77 |
| <b>Moderate Variability</b> |        |         |         |         |         |         |         |         |         |
| R101 (25)                   | 116.14 | 174.35  | 176.09  | 220.92  | 280.23  | 297.39  | 285.97  | 329.67  | 331.35  |
| C101 (25)                   | 172.50 | 279.19  | 297.26  | 298.10  | 414.40  | 455.48  | 368.39  | 455.81  | 458.81  |
| R101 (50)                   | 291.15 | 428.66  | 533.24  | 465.39  | 626.67  | 696.80  | 612.62  | 716.07  | 720.28  |
| C101 (50)                   | 309.06 | 443.90  | 537.97  | 482.63  | 698.81  | 789.58  | 638.66  | 844.36  | 858.20  |
| R101 (75)                   | 452.27 | 718.36  | 856.91  | 780.16  | 1033.13 | 1058.90 | 966.84  | 1076.18 | 1077.50 |
| C101 (75)                   | 660.71 | 967.78  | 1173.75 | 974.42  | 1316.61 | 1347.14 | 1225.73 | 1356.42 | 1360.04 |
| R101 (100)                  | 671.45 | 993.96  | 1246.24 | 1053.50 | 1376.74 | 1449.12 | 1301.85 | 1455.54 | 1457.21 |
| C101 (100)                  | 766.32 | 1217.22 | 1436.74 | 1215.59 | 1667.20 | 1800.42 | 1529.31 | 1803.82 | 1809.18 |
| <b>High Variability</b>     |        |         |         |         |         |         |         |         |         |
| R101 (25)                   | 109.61 | 195.41  | 219.14  | 213.12  | 277.15  | 302.10  | 272.15  | 326.04  | 331.40  |
| C101 (25)                   | 169.01 | 264.90  | 300.51  | 276.92  | 397.80  | 447.47  | 366.01  | 450.30  | 459.99  |
| R101 (50)                   | 290.51 | 393.84  | 488.00  | 453.88  | 616.21  | 673.51  | 599.37  | 708.32  | 716.74  |
| C101 (50)                   | 247.51 | 444.18  | 529.85  | 486.26  | 673.23  | 780.83  | 623.86  | 829.67  | 851.62  |
| R101 (75)                   | 480.08 | 697.26  | 850.07  | 744.92  | 986.39  | 1065.57 | 944.51  | 1072.58 | 1075.62 |
| C101 (75)                   | 645.31 | 970.04  | 1141.26 | 965.10  | 1304.16 | 1356.17 | 1190.92 | 1356.27 | 1360.54 |
| R101 (100)                  | 628.55 | 959.50  | 1165.60 | 1015.45 | 1357.53 | 1437.42 | 1270.79 | 1445.89 | 1452.81 |
| C101 (100)                  | 775.46 | 1206.02 | 1400.92 | 1176.40 | 1628.64 | 1778.19 | 1495.75 | 1790.91 | 1804.53 |

**Table 32** Average Demand Served by One-Step Rollout with Variable Neighborhood Search Heuristic and High Quality Initial Policy.

| Duration Capacity           | short  |        |        | medium |        |        | long   |        |        |
|-----------------------------|--------|--------|--------|--------|--------|--------|--------|--------|--------|
|                             | small  | medium | large  | small  | medium | large  | small  | medium | large  |
| <b>Low Variability</b>      |        |        |        |        |        |        |        |        |        |
| R101 (25)                   | 156.27 | 221.97 | 278.66 | 238.15 | 324.66 | 331.99 | 312.70 | 331.97 | 331.99 |
| C101 (25)                   | 224.13 | 299.07 | 320.02 | 317.52 | 455.22 | 459.42 | 391.72 | 459.21 | 459.62 |
| <b>Moderate Variability</b> |        |        |        |        |        |        |        |        |        |
| R101 (25)                   | 149.92 | 217.48 | 273.20 | 228.68 | 315.03 | 331.34 | 297.57 | 331.32 | 331.53 |
| C101 (25)                   | 217.35 | 293.66 | 319.47 | 307.64 | 434.16 | 458.03 | 385.10 | 456.57 | 458.93 |
| <b>High Variability</b>     |        |        |        |        |        |        |        |        |        |
| R101 (25)                   | 144.75 | 205.71 | 262.16 | 217.58 | 296.90 | 329.50 | 282.51 | 330.81 | 331.54 |
| C101 (25)                   | 203.84 | 280.57 | 312.41 | 299.76 | 409.96 | 454.26 | 373.35 | 453.30 | 459.36 |

**Table 33** Average Demand Served by Post-Decision Rollout with Variable Neighborhood Search Heuristic and High Quality Initial Policy.

| Duration Capacity           | short  |        |        | medium |        |        | long   |        |        |
|-----------------------------|--------|--------|--------|--------|--------|--------|--------|--------|--------|
|                             | small  | medium | large  | small  | medium | large  | small  | medium | large  |
| <b>Low Variability</b>      |        |        |        |        |        |        |        |        |        |
| R101 (25)                   | 156.16 | 221.94 | 278.66 | 237.84 | 325.73 | 332.02 | 311.79 | 331.87 | 331.97 |
| C101 (25)                   | 224.04 | 299.14 | 320.04 | 317.30 | 454.94 | 458.84 | 391.78 | 459.29 | 459.51 |
| <b>Moderate Variability</b> |        |        |        |        |        |        |        |        |        |
| R101 (25)                   | 149.73 | 216.76 | 273.18 | 228.16 | 314.45 | 331.34 | 295.96 | 330.90 | 331.44 |
| C101 (25)                   | 216.74 | 293.29 | 319.38 | 306.73 | 434.42 | 457.48 | 381.97 | 456.44 | 459.00 |
| <b>High Variability</b>     |        |        |        |        |        |        |        |        |        |
| R101 (25)                   | 144.33 | 203.65 | 261.99 | 214.80 | 297.19 | 329.34 | 281.04 | 330.78 | 331.64 |
| C101 (25)                   | 203.67 | 280.13 | 311.35 | 297.58 | 406.11 | 453.88 | 369.91 | 453.12 | 459.35 |

**Table 34 Average Demand Served by Pre-Decision Rollout with Variable Neighborhood Search Heuristic and High Quality Initial Policy.**

| Duration Capacity           | short  |         |         | medium  |         |         | long    |         |         |
|-----------------------------|--------|---------|---------|---------|---------|---------|---------|---------|---------|
|                             | small  | medium  | large   | small   | medium  | large   | small   | medium  | large   |
| <b>Low Variability</b>      |        |         |         |         |         |         |         |         |         |
| R101 (25)                   | 156.27 | 221.93  | 278.66  | 237.32  | 325.40  | 332.01  | 310.68  | 332.02  | 332.04  |
| C101 (25)                   | 223.59 | 298.97  | 320.02  | 317.08  | 454.80  | 458.89  | 391.21  | 459.24  | 459.64  |
| R101 (50)                   | 359.04 | 501.21  | 632.52  | 523.75  | 716.77  | 721.05  | 663.49  | 721.06  | 721.15  |
| C101 (50)                   | 339.34 | 541.36  | 606.52  | 543.89  | 801.46  | 859.47  | 677.41  | 859.17  | 859.91  |
| R101 (75)                   | 595.01 | 832.99  | 1010.60 | 839.79  | 1077.66 | 1078.26 | 1035.17 | 1077.90 | 1078.40 |
| C101 (75)                   | 759.68 | 1098.42 | 1294.70 | 1070.33 | 1359.14 | 1359.92 | 1301.52 | 1360.03 | 1360.05 |
| R101 (100)                  | 808.28 | 1146.63 | 1376.81 | 1144.74 | 1457.27 | 1458.44 | 1387.27 | 1458.15 | 1458.60 |
| C101 (100)                  | 923.01 | 1351.92 | 1649.03 | 1306.63 | 1804.02 | 1810.66 | 1633.45 | 1809.98 | 1810.83 |
| <b>Moderate Variability</b> |        |         |         |         |         |         |         |         |         |
| R101 (25)                   | 149.45 | 216.95  | 273.20  | 225.92  | 313.48  | 331.28  | 294.11  | 331.34  | 331.61  |
| C101 (25)                   | 215.77 | 293.30  | 319.31  | 304.22  | 431.24  | 457.79  | 378.42  | 457.23  | 459.23  |
| R101 (50)                   | 332.39 | 487.05  | 610.56  | 499.88  | 694.03  | 720.07  | 628.84  | 720.11  | 720.47  |
| C101 (50)                   | 328.08 | 509.00  | 582.59  | 518.13  | 765.66  | 847.90  | 653.64  | 853.89  | 858.35  |
| R101 (75)                   | 565.08 | 792.75  | 963.92  | 803.36  | 1063.61 | 1076.80 | 989.36  | 1076.44 | 1077.49 |
| C101 (75)                   | 728.57 | 1050.84 | 1257.77 | 1027.16 | 1341.25 | 1357.94 | 1252.72 | 1359.93 | 1359.45 |
| R101 (100)                  | 770.09 | 1099.90 | 1327.86 | 1092.41 | 1439.93 | 1456.69 | 1331.08 | 1456.28 | 1457.17 |
| C101 (100)                  | 868.88 | 1301.46 | 1589.85 | 1255.32 | 1763.09 | 1807.79 | 1570.31 | 1808.32 | 1809.78 |
| <b>High Variability</b>     |        |         |         |         |         |         |         |         |         |
| R101 (25)                   | 142.13 | 203.68  | 262.10  | 215.29  | 294.02  | 329.18  | 278.94  | 330.55  | 331.70  |
| C101 (25)                   | 198.77 | 278.74  | 310.25  | 291.58  | 402.61  | 454.84  | 368.12  | 452.82  | 459.34  |
| R101 (50)                   | 317.86 | 463.98  | 575.06  | 479.49  | 660.32  | 714.76  | 607.18  | 715.22  | 716.88  |
| C101 (50)                   | 314.59 | 477.66  | 565.33  | 493.29  | 706.10  | 821.04  | 633.11  | 835.45  | 854.82  |
| R101 (75)                   | 522.63 | 756.31  | 907.13  | 772.34  | 1033.27 | 1074.47 | 957.86  | 1074.78 | 1075.57 |
| C101 (75)                   | 691.07 | 1002.23 | 1183.76 | 985.39  | 1316.55 | 1358.98 | 1202.00 | 1357.80 | 1360.54 |
| R101 (100)                  | 721.00 | 1034.13 | 1249.64 | 1048.12 | 1393.00 | 1451.35 | 1289.19 | 1451.09 | 1452.82 |
| C101 (100)                  | 814.20 | 1230.49 | 1501.26 | 1205.63 | 1669.21 | 1798.50 | 1508.56 | 1802.21 | 1805.79 |

**Table 35 Average Demand Served by One-Step Rollout with Variable Neighborhood Search Heuristic and Low Quality Initial Policy.**

| Duration Capacity           | short  |        |        | medium |        |        | long   |        |        |
|-----------------------------|--------|--------|--------|--------|--------|--------|--------|--------|--------|
|                             | small  | medium | large  | small  | medium | large  | small  | medium | large  |
| <b>Low Variability</b>      |        |        |        |        |        |        |        |        |        |
| R101 (25)                   | 143.29 | 193.08 | 232.77 | 229.56 | 298.50 | 327.35 | 297.95 | 332.03 | 331.99 |
| C101 (25)                   | 204.85 | 297.77 | 299.86 | 313.20 | 448.34 | 459.52 | 385.85 | 459.37 | 459.64 |
| <b>Moderate Variability</b> |        |        |        |        |        |        |        |        |        |
| R101 (25)                   | 116.84 | 179.62 | 204.13 | 224.10 | 299.32 | 316.42 | 292.81 | 331.01 | 331.49 |
| C101 (25)                   | 179.26 | 281.77 | 300.53 | 304.64 | 422.95 | 457.72 | 378.73 | 458.78 | 458.91 |
| <b>High Variability</b>     |        |        |        |        |        |        |        |        |        |
| R101 (25)                   | 109.95 | 197.03 | 228.82 | 215.95 | 291.68 | 307.10 | 276.78 | 329.04 | 331.65 |
| C101 (25)                   | 176.03 | 269.49 | 311.49 | 281.23 | 402.27 | 451.04 | 371.09 | 452.06 | 459.96 |

**Table 36 Average Demand Served by Post-Decision Rollout with Variable Neighborhood Search Heuristic and Low Quality Initial Policy.**

| Duration Capacity           | short  |        |        | medium |        |        | long   |        |        |
|-----------------------------|--------|--------|--------|--------|--------|--------|--------|--------|--------|
|                             | small  | medium | large  | small  | medium | large  | small  | medium | large  |
| <b>Low Variability</b>      |        |        |        |        |        |        |        |        |        |
| R101 (25)                   | 143.23 | 195.11 | 227.24 | 229.61 | 303.88 | 327.57 | 301.56 | 331.95 | 331.98 |
| C101 (25)                   | 204.76 | 297.88 | 300.00 | 314.96 | 437.72 | 459.49 | 384.91 | 459.17 | 459.62 |
| <b>Moderate Variability</b> |        |        |        |        |        |        |        |        |        |
| R101 (25)                   | 116.69 | 183.42 | 208.66 | 222.20 | 297.30 | 319.49 | 290.64 | 330.95 | 331.49 |
| C101 (25)                   | 177.47 | 284.84 | 300.50 | 303.20 | 420.61 | 457.71 | 376.72 | 458.76 | 458.84 |
| <b>High Variability</b>     |        |        |        |        |        |        |        |        |        |
| R101 (25)                   | 106.23 | 195.12 | 226.53 | 212.95 | 288.94 | 307.56 | 275.31 | 329.37 | 331.60 |
| C101 (25)                   | 173.69 | 264.42 | 310.38 | 280.22 | 399.08 | 451.10 | 368.36 | 451.67 | 459.99 |

**Table 37** Average Demand Served by Pre-Decision Rollout with Variable Neighborhood Search Heuristic and Low Quality Initial Policy.

| Duration<br>Capacity        | short  |         |         | medium  |         |         | long    |         |         |
|-----------------------------|--------|---------|---------|---------|---------|---------|---------|---------|---------|
|                             | small  | medium  | large   | small   | medium  | large   | small   | medium  | large   |
| <b>Low Variability</b>      |        |         |         |         |         |         |         |         |         |
| <b>R101 (25)</b>            | 142.89 | 192.54  | 218.29  | 216.35  | 296.29  | 316.42  | 297.35  | 331.69  | 332.01  |
| <b>C101 (25)</b>            | 196.26 | 289.26  | 296.97  | 297.62  | 423.40  | 459.05  | 379.07  | 459.22  | 459.64  |
| <b>R101 (50)</b>            | 305.27 | 423.39  | 557.71  | 482.94  | 654.65  | 686.62  | 620.51  | 720.64  | 720.93  |
| <b>C101 (50)</b>            | 306.17 | 475.15  | 571.89  | 499.10  | 712.85  | 826.03  | 643.64  | 851.81  | 859.21  |
| <b>R101 (75)</b>            | 534.63 | 738.25  | 848.68  | 785.62  | 1019.21 | 1058.30 | 974.35  | 1078.32 | 1078.38 |
| <b>C101 (75)</b>            | 676.88 | 996.71  | 1192.65 | 990.96  | 1332.91 | 1354.16 | 1240.57 | 1359.44 | 1360.03 |
| <b>R101 (100)</b>           | 652.06 | 1012.47 | 1182.86 | 1052.57 | 1381.58 | 1441.39 | 1321.52 | 1458.15 | 1458.48 |
| <b>C101 (100)</b>           | 771.81 | 1226.84 | 1487.96 | 1207.08 | 1689.89 | 1765.98 | 1534.50 | 1809.44 | 1810.59 |
| <b>Moderate Variability</b> |        |         |         |         |         |         |         |         |         |
| <b>R101 (25)</b>            | 117.30 | 178.21  | 199.66  | 219.08  | 290.72  | 310.20  | 287.67  | 330.22  | 331.55  |
| <b>C101 (25)</b>            | 177.25 | 279.28  | 300.05  | 299.20  | 415.32  | 456.49  | 368.74  | 457.98  | 459.13  |
| <b>R101 (50)</b>            | 295.56 | 443.09  | 528.59  | 471.11  | 636.67  | 687.83  | 614.07  | 715.75  | 720.40  |
| <b>C101 (50)</b>            | 309.86 | 424.41  | 529.42  | 481.60  | 690.08  | 803.73  | 640.12  | 839.44  | 858.06  |
| <b>R101 (75)</b>            | 475.10 | 718.45  | 845.18  | 778.16  | 1002.80 | 1052.10 | 959.90  | 1076.31 | 1077.42 |
| <b>C101 (75)</b>            | 664.95 | 973.10  | 1179.69 | 974.43  | 1293.24 | 1352.53 | 1221.42 | 1358.75 | 1360.49 |
| <b>R101 (100)</b>           | 666.45 | 985.50  | 1178.08 | 1044.39 | 1354.82 | 1424.41 | 1296.30 | 1455.31 | 1457.20 |
| <b>C101 (100)</b>           | 780.64 | 1211.78 | 1459.91 | 1206.70 | 1655.12 | 1777.29 | 1514.45 | 1803.17 | 1809.24 |
| <b>High Variability</b>     |        |         |         |         |         |         |         |         |         |
| <b>R101 (25)</b>            | 104.65 | 189.90  | 224.80  | 211.34  | 284.40  | 300.64  | 273.16  | 327.25  | 331.63  |
| <b>C101 (25)</b>            | 170.31 | 258.22  | 305.61  | 278.91  | 397.33  | 446.45  | 366.93  | 451.27  | 459.98  |
| <b>R101 (50)</b>            | 292.25 | 412.37  | 508.01  | 452.08  | 619.24  | 670.41  | 595.57  | 706.27  | 716.63  |
| <b>C101 (50)</b>            | 253.47 | 438.07  | 528.14  | 484.76  | 665.17  | 789.82  | 621.36  | 818.19  | 853.23  |
| <b>R101 (75)</b>            | 479.76 | 704.93  | 839.25  | 747.32  | 977.11  | 1044.40 | 940.28  | 1072.28 | 1075.53 |
| <b>C101 (75)</b>            | 648.97 | 958.43  | 1135.94 | 956.01  | 1283.97 | 1348.34 | 1189.68 | 1356.51 | 1360.52 |
| <b>R101 (100)</b>           | 628.13 | 960.97  | 1143.07 | 1015.23 | 1325.16 | 1411.81 | 1258.76 | 1447.51 | 1452.73 |
| <b>C101 (100)</b>           | 775.62 | 1186.93 | 1394.33 | 1166.70 | 1604.52 | 1746.24 | 1482.95 | 1787.76 | 1805.74 |
